# Supplementary material for: Combined Application of Biochar and Plant Growth-Promoting Rhizobacteria Improves Heavy Metal and Drought Stress Tolerance in Zea mays
Source: MDPI journal article supplement (doi:10.3390/plants13081143), 2024-04-19
Supplement: s1 [file s1]

### Supplementary

**Table S1. Physico-chemical characteristics of Groundnut shell biochar**

| Parameters                               | GS-BC            |
|------------------------------------------|------------------|
| pH                                       | 7.77             |
| Conductivity (mS cm <sup>-1</sup> )      | 2.61             |
| CEC (Cmol Kg <sup>-1</sup> )             | 7.9              |
| Moisture Content (%)                     | 2.73 ± 1.93      |
| Organic Matter (%)                       | 95 ± 0.34        |
| Volatile matter (%)                      | 39.1 ± 0.1       |
| Ash (%)                                  | 9.3 ± 0.1        |
| Yield %                                  | 43 ± 1.7         |
| Surface area (m <sup>2</sup> /gm)        | 3.54             |
| Elemental Compostion(%)                  |                  |
| C                                        | 60.3             |
| N                                        | 2.1              |
| H                                        | 3.3              |
| O                                        | 21.5             |
| Nutrient contents (mg kg <sup>-1</sup> ) |                  |
| P                                        | 1489.81 ± 4.93   |
| K                                        | 17145.41 ± 21.38 |
| Na                                       | 195.30 ± 0.71    |
| Mg                                       | 1224.72 ± 3.21   |
| Al                                       | 930.7 ± 5.23     |
| Cu                                       | 0.51 ± 0.06      |
| Fe                                       | 1053 ± 2.51      |
| Mn                                       | 52.07 ± 0.13     |
| Zn                                       | 20.71 ± 0.11     |
| Cd                                       | BDL              |
| Cr                                       | BDL              |
| Ni                                       | 1.53 ± 0.17      |
| As                                       | 1.10 ± 0.02      |

Values are means ± standard deviations of three samples. BDL- below detection limits.

**Table S2.** Heavy metal stress tolerance and plant growth-promoting features of ARN7.

| Characteristics                                         | ARN7             |             |             |             |                 |                 |
|---------------------------------------------------------|------------------|-------------|-------------|-------------|-----------------|-----------------|
| <u>Metal tolerance level (mg L<sup>-1</sup>)</u>        |                  |             |             |             |                 |                 |
| Ni                                                      | 200              |             |             |             |                 |                 |
| Cu                                                      | 100              |             |             |             |                 |                 |
| Zn                                                      | 400              |             |             |             |                 |                 |
| Cr                                                      | 200              |             |             |             |                 |                 |
| Cd                                                      | 100              |             |             |             |                 |                 |
| <u>In vitro plant growth promotion</u>                  |                  |             |             |             |                 |                 |
| Shoot length (cm)                                       | 2.97 ± 0.25      |             |             |             |                 |                 |
| Root length (cm)                                        | 14.23 ± 0.25     |             |             |             |                 |                 |
| Fresh weight (g plant <sup>-1</sup> )                   | 0.024 ± 0.001    |             |             |             |                 |                 |
|                                                         | <b>Treatment</b> |             |             |             |                 |                 |
| <b>PGP traits</b>                                       | Control          | PEG 15%     | PEG 30%     | HM          | PEG 15%<br>+ HM | PEG 30%<br>+ HM |
| IAA production (µg mL <sup>-1</sup> )                   | 2.6 ± 0.19       | 2.3 ± 0.08  | 2.4 ± 0.08  | 1.9 ± 0.04  | 1.9 ± 0.07      | 2.0 ± 0.15      |
| Siderophore production (%)                              | 13.8 ± 1.78      | 14.6 ± 0.60 | 5.2 ± 1.03  | 10.9 ± 0.59 | 6.8 ± 2.16      | 3.2 ± 0.87      |
| Catechol (µg mL <sup>-1</sup> )                         | -                | -           | -           | -           | -               | -               |
| Hydroxamate (µg mL <sup>-1</sup> )                      | 41.0 ± 1.01      | 37.0 ± 2.13 | 27.0 ± 1.04 | 12.7 ± 2.06 | 10.0 ± 1.21     | 5.0 ± 0.09      |
| P solubilization (mg mL <sup>-1</sup> )                 | 90.9 ± 3.83      | 58.3 ± 1.49 | 29.7 ± 5.95 | 80.6 ± 3.25 | 47.6 ± 4.36     | 25.0 ± 2.99     |
| Exopolysaccharides<br>production (mg mL <sup>-1</sup> ) | 2.1 ± 0.01       | 4.0 ± 0.01  | 4.4 ± 0.03  | 4.3 ± 0.04  | 7.8 ± 0.05      | 9.1 ± 0.05      |

HM – heavy metal (Nickel -150 mg L<sup>-1</sup>+ Zinc 300 mg L<sup>-1</sup>); PEG – Polyethylene Glycol 6000; Values are means ± standard deviations of three samples.

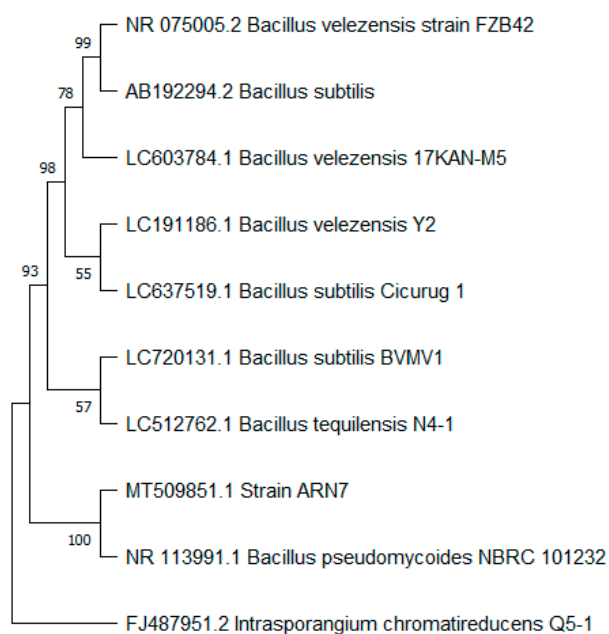

**Figure S1.** Phylogenetic tree showing the relationship of partial 16S rRNA gene sequences of ARN7 with other related sequences obtained from NCBI database. The tree was clustered with the neighbor-joining method using MEGA 11 package

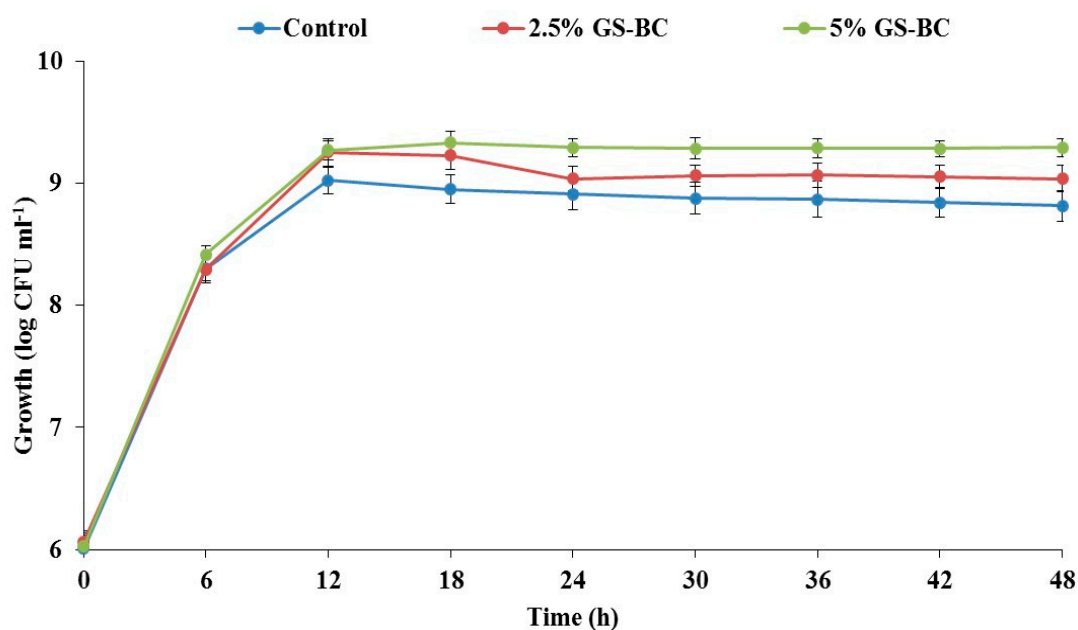

**Figure S2.** Growth pattern of ARN7 in tryptone soy broth medium supplemented with 0, 2.5 or 5% biochar.
